# Supplementary material for: Influence of Planting Xanthoceras Sorbifolia Bunge on Bacteria and Fungi Diversity of Fly Ash
Source: Research Square preprint supplement (doi:10.21203/rs.3.rs-787998/v1), 2021-08-17
Supplement: Supplementary file 1 [file 266be0314573340fa3c63b85.docx]

Table S2. Statistical table of per level species of bacteria

|  | **Kindom** | **Phylum** | **Class** | **Order** | **Family** | **Genus** | **Species** |
| --- | --- | --- | --- | --- | --- | --- | --- |
| **CK11** | **2** | **31** | **72** | **172** | **305** | **617** | **678** |
| **CK12** | **2** | **32** | **78** | **185** | **317** | **640** | **693** |
| **CK13** | **2** | **31** | **76** | **182** | **313** | **638** | **693** |
| **S21** | **1** | **30** | **80** | **190** | **333** | **690** | **751** |
| **S22** | **2** | **28** | **75** | **177** | **298** | **489** | **519** |
| **S23** | **2** | **31** | **82** | **198** | **336** | **615** | **666** |
| **Total** | **2** | **37** | **99** | **251** | **433** | **896** | **995** |
